# Supplementary material for: Reduction of bias in the evaluation of fractional anisotropy and mean diffusivity in magnetic resonance diffusion tensor imaging using region-of-interest methodology
Source: PubMed Central journal article supplement (PMC6739503; doi:10.1038/s41598-019-49311-w), 2019-09-11
Supplement: 41598_2019_49311_MOESM1_ESM.pdf [file 41598_2019_49311_MOESM1_ESM.pdf]

## Supplementary Material

Reduction of bias in the evaluation of fractional anisotropy and mean diffusivity in magnetic resonance diffusion tensor imaging using region-of-interest methodology

Youngseob Seo, Nancy K. Rollins, Zhiyue J. Wang

Supplementary Table 1. Percent differences ( $\% \Delta \text{SNR}$ ) in SNR between ACQ groups (1, 2 and 3) and ACQ groups (13, 14 and 15) are shown in the selected regions on 1.5 T Philips with 15 repeated DTI scan time of 72 minutes. Each SNR value was calculated from a pair of images using a difference method described in the Methods section. SNR values derived from earlier and later acquisitions differed by  $\leq 8.1\%$ . SNRs in earlier acquisitions are close to those in subsequent acquisitions.

| Brain region |             | ACQ(1, 2) | ACQ(1, 3) | ACQ(2, 3) | ACQ(13, 14) | ACQ(13, 15) |
|--------------|-------------|-----------|-----------|-----------|-------------|-------------|
| CN           | ACQ(1, 3)   | 4.9       |           |           |             |             |
|              | ACQ(2, 3)   | 3.9       | 5.6       |           |             |             |
|              | ACQ(13, 14) | 6.1       | 6.2       | 5.9       |             |             |
|              | ACQ(13, 15) | 7.6       | 7.0       | 6.8       | 4.8         |             |
|              | ACQ(14, 15) | 6.8       | 6.4       | 6.1       | 5.7         | 5.5         |
| GP           | ACQ(1, 3)   | 5.1       |           |           |             |             |
|              | ACQ(2, 3)   | 6.2       | 5.3       |           |             |             |
|              | ACQ(13, 14) | 5.5       | 6.5       | 7.3       |             |             |
|              | ACQ(13, 15) | 6.9       | 5.9       | 6.2       | 6.0         |             |
|              | ACQ(14, 15) | 6.4       | 7.5       | 7.0       | 5.1         | 6.2         |
| PUT          | ACQ(1, 3)   | 5.3       |           |           |             |             |
|              | ACQ(2, 3)   | 4.4       | 5.7       |           |             |             |
|              | ACQ(13, 14) | 5.2       | 5.9       | 6.2       |             |             |
|              | ACQ(13, 15) | 6.5       | 6.1       | 6.3       | 5.4         |             |
|              | ACQ(14, 15) | 7.3       | 7.7       | 6.7       | 5.9         | 4.0         |
| STG          | ACQ(1, 3)   | 6.6       |           |           |             |             |
|              | ACQ(2, 3)   | 5.7       | 5.9       |           |             |             |
|              | ACQ(13, 14) | 6.4       | 6.8       | 7.0       |             |             |

|                |             |     |     |     |     |     |
|----------------|-------------|-----|-----|-----|-----|-----|
|                | ACQ(13, 15) | 6.8 | 6.5 | 6.3 | 5.9 |     |
|                | ACQ(14, 15) | 8.1 | 7.7 | 4.9 | 6.8 | 5.3 |
| Thalamus<br>LD | ACQ(1, 3)   | 3.8 |     |     |     |     |
|                | ACQ(2, 3)   | 5.5 | 4.0 |     |     |     |
|                | ACQ(13, 14) | 6.4 | 6.9 | 5.8 |     |     |
|                | ACQ(13, 15) | 6.6 | 6.5 | 6.2 | 5.0 |     |
|                | ACQ(14, 15) | 7.8 | 6.1 | 6.8 | 4.7 | 5.8 |
| Thalamus<br>VA | ACQ(1, 3)   | 5.8 |     |     |     |     |
|                | ACQ(2, 3)   | 4.1 | 6.1 |     |     |     |
|                | ACQ(13, 14) | 5.9 | 6.4 | 5.7 |     |     |
|                | ACQ(13, 15) | 7.5 | 6.3 | 6.9 | 5.1 |     |
|                | ACQ(14, 15) | 6.1 | 6.7 | 7.1 | 5.3 | 5.0 |
| Thalamus<br>VP | ACQ(1, 3)   | 2.4 |     |     |     |     |
|                | ACQ(2, 3)   | 5.6 | 4.5 |     |     |     |
|                | ACQ(13, 14) | 6.4 | 5.2 | 5.0 |     |     |
|                | ACQ(13, 15) | 6.2 | 7.3 | 6.2 | 5.1 |     |
|                | ACQ(14, 15) | 6.7 | 6.9 | 5.5 | 4.7 | 3.6 |

ACQ, acquisition; CN, caudate nucleus; FA, fractional anisotropy; GP, globus pallidus; LD, lateral dorsal; MD, mean diffusivity; NSA, number of signal average; PUT, putamen; SNR, signal-to-noise ratio; STG, superior temporal gyrus; VA, ventral anterior; VP, ventral posterior.

Supplementary Table 2. Percent differences (% $\Delta$ SNR) in SNR between ACQ groups (1, 2 and 3) and ACQ groups (13, 14 and 15) are shown in the selected regions on 3 T Philips with 15 repeated DTI scan time of 78 minutes. Each SNR value was calculated from a pair of images using a difference method described in the Methods section. SNR values derived from earlier and later acquisitions differed by  $\leq 8.3\%$ . SNRs in earlier acquisitions are similar with those in subsequent acquisitions.

| Brain region |            | ACQ(1, 2) | ACQ(1, 3) | ACQ(2, 3) | ACQ(13, 14) | ACQ(13, 15) |
|--------------|------------|-----------|-----------|-----------|-------------|-------------|
| CN           | ACQ(1,3)   | 2.9       |           |           |             |             |
|              | ACQ(2,3)   | 5.0       | 4.7       |           |             |             |
|              | ACQ(13,14) | 6.0       | 5.1       | 6.1       |             |             |
|              | ACQ(13,15) | 7.2       | 6.9       | 6.1       | 4.4         |             |
|              | ACQ(14,15) | 6.9       | 6.4       | 7.8       | 5.7         | 3.8         |
| GP           | ACQ(1,3)   | 4.7       |           |           |             |             |
|              | ACQ(2,3)   | 5.4       | 6.2       |           |             |             |
|              | ACQ(13,14) | 6.1       | 6.6       | 6.1       |             |             |
|              | ACQ(13,15) | 6.6       | 8.0       | 5.9       | 5.3         |             |
|              | ACQ(14,15) | 5.8       | 6.3       | 6.4       | 5.6         | 6.5         |
| PUT          | ACQ(1,3)   | 4.2       |           |           |             |             |
|              | ACQ(2,3)   | 5.9       | 5.1       |           |             |             |
|              | ACQ(13,14) | 5.6       | 6.4       | 6.5       |             |             |
|              | ACQ(13,15) | 6.4       | 5.7       | 6.7       | 5.9         |             |
|              | ACQ(14,15) | 6.9       | 7.7       | 5.2       | 6.1         | 4.6         |
| STG          | ACQ(1,3)   | 5.8       |           |           |             |             |
|              | ACQ(2,3)   | 4.5       | 5.6       |           |             |             |
|              | ACQ(13,14) | 6.3       | 5.9       | 6.6       |             |             |

|                |            |     |     |     |     |     |
|----------------|------------|-----|-----|-----|-----|-----|
|                | ACQ(13,15) | 7.9 | 7.5 | 6.0 | 6.0 |     |
|                | ACQ(14,15) | 8.3 | 6.5 | 5.3 | 5.7 | 5.9 |
| Thalamus<br>LD | ACQ(1,3)   | 4.6 |     |     |     |     |
|                | ACQ(2,3)   | 5.3 | 5.1 |     |     |     |
|                | ACQ(13,14) | 5.8 | 5.3 | 6.0 |     |     |
|                | ACQ(13,15) | 6.9 | 6.6 | 6.8 | 5.9 |     |
|                | ACQ(14,15) | 7.7 | 6.7 | 5.1 | 4.8 | 4.9 |
| Thalamus<br>VA | ACQ(1,3)   | 3.9 |     |     |     |     |
|                | ACQ(2,3)   | 4.7 | 5.1 |     |     |     |
|                | ACQ(13,14) | 5.4 | 5.1 | 5.7 |     |     |
|                | ACQ(13,15) | 6.2 | 6.9 | 6.6 | 5.8 |     |
|                | ACQ(14,15) | 6.1 | 6.3 | 6.7 | 6.1 | 5.1 |
| Thalamus<br>VP | ACQ(1,3)   | 1.6 |     |     |     |     |
|                | ACQ(2,3)   | 4.9 | 3.2 |     |     |     |
|                | ACQ(13,14) | 6.3 | 5.9 | 6.8 |     |     |
|                | ACQ(13,15) | 6.0 | 7.1 | 6.1 | 5.4 |     |
|                | ACQ(14,15) | 7.7 | 6.3 | 6.4 | 6.2 | 4.8 |

ACQ, acquisition; CN, caudate nucleus; FA, fractional anisotropy; GP, globus pallidus; LD, lateral dorsal; MD, mean diffusivity; NSA, number of signal average; PUT, putamen; SNR, signal-to-noise ratio; STG, superior temporal gyrus; VA, ventral anterior; VP, ventral posterior.

Supplementary Table 3. Percent differences ( $\% \Delta \text{SNR}$ ) in SNR between ACQ groups (1, 2 and 3) and ACQ groups (13, 14 and 15) are shown in the selected regions on 3 T Siemens with 15 repeated DTI scan time of 88 minutes. Each SNR value was calculated from a pair of images using a difference method described in the Methods section. SNR values derived from earlier acquisitions and later acquisitions differed by  $\leq 7.9\%$ . SNRs in earlier acquisitions are close to those in subsequent acquisitions.

| Brain region |            | ACQ(1, 2) | ACQ(1, 3) | ACQ(2, 3) | ACQ(13, 14) | ACQ(13, 15) |
|--------------|------------|-----------|-----------|-----------|-------------|-------------|
| CN           | ACQ(1,3)   | 4.8       |           |           |             |             |
|              | ACQ(2,3)   | 4.3       | 2.1       |           |             |             |
|              | ACQ(13,14) | 5.5       | 6.3       | 6.2       |             |             |
|              | ACQ(13,15) | 6.4       | 7.0       | 6.7       | 5.4         |             |
|              | ACQ(14,15) | 7.3       | 6.4       | 5.2       | 4.9         | 5.2         |
| GP           | ACQ(1,3)   | 5.3       |           |           |             |             |
|              | ACQ(2,3)   | 4.2       | 5.7       |           |             |             |
|              | ACQ(13,14) | 6.4       | 5.9       | 6.8       |             |             |
|              | ACQ(13,15) | 6.7       | 6.9       | 6.8       | 4.6         |             |
|              | ACQ(14,15) | 6.3       | 6.4       | 6.6       | 5.5         | 5.7         |
| PUT          | ACQ(1,3)   | 3.2       |           |           |             |             |
|              | ACQ(2,3)   | 5.5       | 5.7       |           |             |             |
|              | ACQ(13,14) | 6.6       | 6.0       | 7.7       |             |             |
|              | ACQ(13,15) | 6.0       | 6.6       | 5.9       | 5.6         |             |
|              | ACQ(14,15) | 6.4       | 6.9       | 6.1       | 6.8         | 4.4         |
| STG          | ACQ(1,3)   | 4.1       |           |           |             |             |
|              | ACQ(2,3)   | 5.7       | 6.1       |           |             |             |
|              | ACQ(13,14) | 6.6       | 6.5       | 5.8       |             |             |

|                |            |     |     |     |     |     |
|----------------|------------|-----|-----|-----|-----|-----|
|                | ACQ(13,15) | 6.7 | 6.8 | 6.3 | 6.3 |     |
|                | ACQ(14,15) | 6.0 | 6.7 | 7.1 | 7.3 | 5.9 |
| Thalamus<br>LD | ACQ(1,3)   | 5.6 |     |     |     |     |
|                | ACQ(2,3)   | 5.4 | 6.6 |     |     |     |
|                | ACQ(13,14) | 6.2 | 6.4 | 7.9 |     |     |
|                | ACQ(13,15) | 6.6 | 7.2 | 7.8 | 5.6 |     |
|                | ACQ(14,15) | 6.8 | 6.5 | 7.1 | 5.7 | 4.9 |
| Thalamus<br>VA | ACQ(1,3)   | 3.1 |     |     |     |     |
|                | ACQ(2,3)   | 5.3 | 6.0 |     |     |     |
|                | ACQ(13,14) | 6.5 | 6.4 | 5.8 |     |     |
|                | ACQ(13,15) | 7.4 | 6.7 | 5.9 | 6.0 |     |
|                | ACQ(14,15) | 7.3 | 7.9 | 6.6 | 5.7 | 5.1 |
| Thalamus<br>VP | ACQ(1,3)   | 4.9 |     |     |     |     |
|                | ACQ(2,3)   | 3.3 | 4.2 |     |     |     |
|                | ACQ(13,14) | 6.0 | 5.6 | 6.1 |     |     |
|                | ACQ(13,15) | 6.4 | 6.4 | 6.6 | 4.4 |     |
|                | ACQ(14,15) | 6.8 | 7.3 | 6.2 | 5.9 | 3.7 |

ACQ, acquisition; CN, caudate nucleus; FA, fractional anisotropy; GP, globus pallidus; LD, lateral dorsal; MD, mean diffusivity; NSA, number of signal average; PUT, putamen; SNR, signal-to-noise ratio; STG, superior temporal gyrus; VA, ventral anterior; VP, ventral posterior.

Supplementary Table 4. Percent differences ( $\% \Delta \text{SNR}$ ) in SNR between ACQ groups (1, 2 and 3) and ACQ groups (13, 14 and 15) are shown in the selected regions on 3 T GE with 15 repeated DTI scan time of 97 minutes. The SNR values were calculated from a pair of images using a difference method described in the Methods section. SNR values derived from earlier acquisitions and later acquisitions differed by  $\leq 8.2\%$ . SNRs in earlier acquisitions are close to those in subsequent acquisitions.

| Brain region |            | ACQ(1, 2) | ACQ(1, 3) | ACQ(2, 3) | ACQ(13, 14) | ACQ(13, 15) |
|--------------|------------|-----------|-----------|-----------|-------------|-------------|
| CN           | ACQ(1,3)   | 2.0       |           |           |             |             |
|              | ACQ(2,3)   | 1.8       | 4.3       |           |             |             |
|              | ACQ(13,14) | 5.7       | 6.2       | 5.8       |             |             |
|              | ACQ(13,15) | 6.1       | 6.6       | 6.9       | 5.2         |             |
|              | ACQ(14,15) | 7.1       | 7.3       | 6.3       | 5.1         | 5.6         |
| GP           | ACQ(1,3)   | 4.3       |           |           |             |             |
|              | ACQ(2,3)   | 4.9       | 3.8       |           |             |             |
|              | ACQ(13,14) | 8.0       | 6.5       | 6.3       |             |             |
|              | ACQ(13,15) | 7.6       | 6.5       | 6.9       | 4.9         |             |
|              | ACQ(14,15) | 6.5       | 7.3       | 7.0       | 5.1         | 4.7         |
| PUT          | ACQ(1,3)   | 4.4       |           |           |             |             |
|              | ACQ(2,3)   | 3.1       | 4.4       |           |             |             |
|              | ACQ(13,14) | 5.5       | 6.7       | 6.3       |             |             |
|              | ACQ(13,15) | 6.4       | 7.5       | 6.8       | 6.3         |             |
|              | ACQ(14,15) | 7.2       | 6.3       | 7.7       | 6.6         | 4.5         |
| STG          | ACQ(1,3)   | 4.1       |           |           |             |             |
|              | ACQ(2,3)   | 4.7       | 4.8       |           |             |             |
|              | ACQ(13,14) | 7.2       | 6.6       | 5.8       |             |             |
|              | ACQ(13,15) | 8.2       | 6.7       | 6.1       | 4.5         |             |



|             |            |     |     |     |     |     |
|-------------|------------|-----|-----|-----|-----|-----|
|             | ACQ(14,15) | 6.7 | 7.5 | 6.9 | 4.8 | 5.2 |
| Thalamus LD | ACQ(1,3)   | 4.3 |     |     |     |     |
|             | ACQ(2,3)   | 4.5 | 5.6 |     |     |     |
|             | ACQ(13,14) | 5.2 | 6.4 | 6.0 |     |     |
|             | ACQ(13,15) | 6.6 | 6.2 | 6.7 | 5.6 |     |
|             | ACQ(14,15) | 7.7 | 6.8 | 6.6 | 6.3 | 5.9 |
| Thalamus VA | ACQ(1,3)   | 6.1 |     |     |     |     |
|             | ACQ(2,3)   | 5.9 | 5.8 |     |     |     |
|             | ACQ(13,14) | 6.2 | 6.2 | 5.7 |     |     |
|             | ACQ(13,15) | 6.7 | 6.3 | 7.8 | 4.3 |     |
|             | ACQ(14,15) | 7.1 | 8.1 | 6.5 | 5.8 | 4.1 |
| Thalamus VP | ACQ(1,3)   | 3.8 |     |     |     |     |
|             | ACQ(2,3)   | 2.9 | 3.5 |     |     |     |
|             | ACQ(13,14) | 6.7 | 5.1 | 7.5 |     |     |
|             | ACQ(13,15) | 5.8 | 6.9 | 6.4 | 5.2 |     |
|             | ACQ(14,15) | 6.6 | 7.5 | 7.0 | 5.8 | 6.4 |

ACQ, acquisition; CN, caudate nucleus; FA, fractional anisotropy; GP, globus pallidus; LD, lateral dorsal; MD, mean diffusivity; NSA, number of signal average; PUT, putamen; SNR, signal-to-noise ratio; STG, superior temporal gyrus; VA, ventral anterior; VP, ventral posterior.

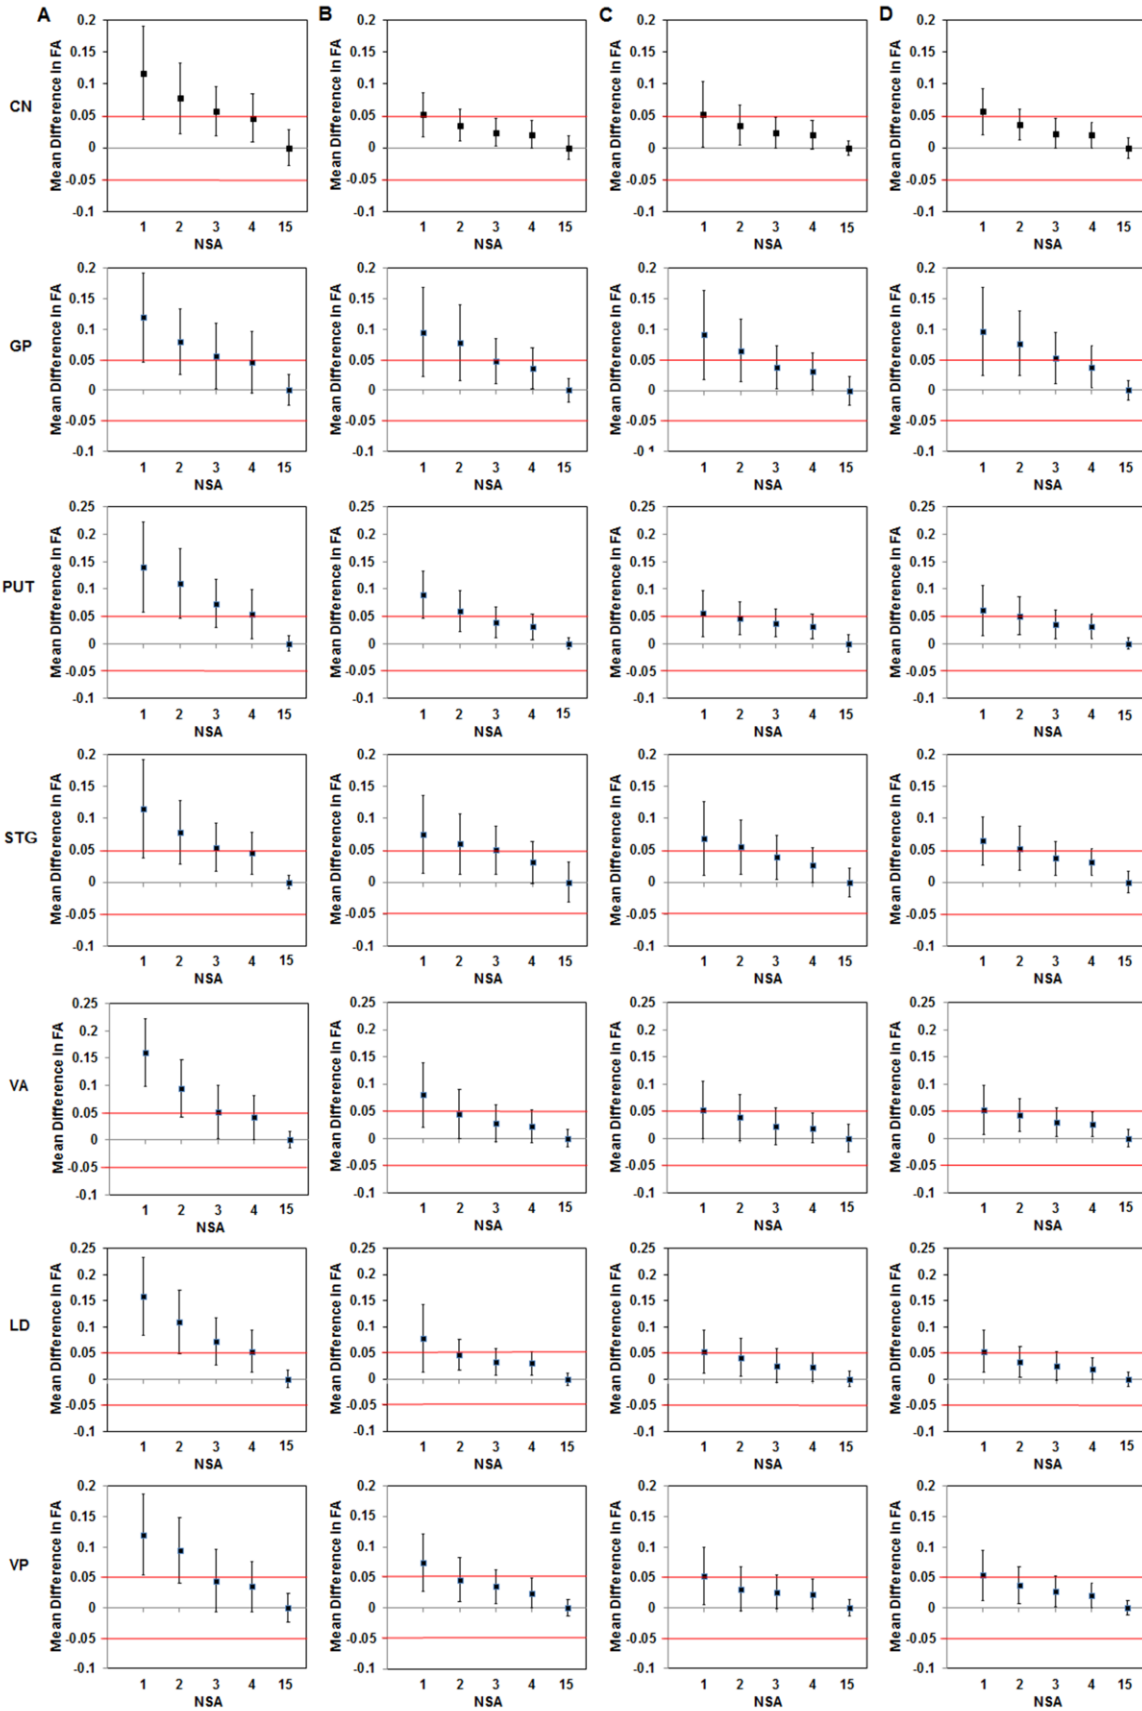

Supplementary Figure 1. Equivalence testing for the determination of the minimum NSA for bias-free FA evaluation is shown at voxel-based analysis at 1.5 T Philips (A), 3 T Philips (B), 3 T Siemens (C) and 3 T GE (D) MRI systems (Equivalence tolerance range = [-.05, .05]). FA, fractional anisotropy; NSA, number of signal average. While the 90% CIs of voxel-based FA at 1.5 T Philips were not within the equivalence tolerance range for all the selected regions, for voxel-based FA at 3 T Philips, Siemens and GE, CN only had equivalence threshold at NSA=3, and CN, VA, LD and VP had equivalence threshold at NSA=4.

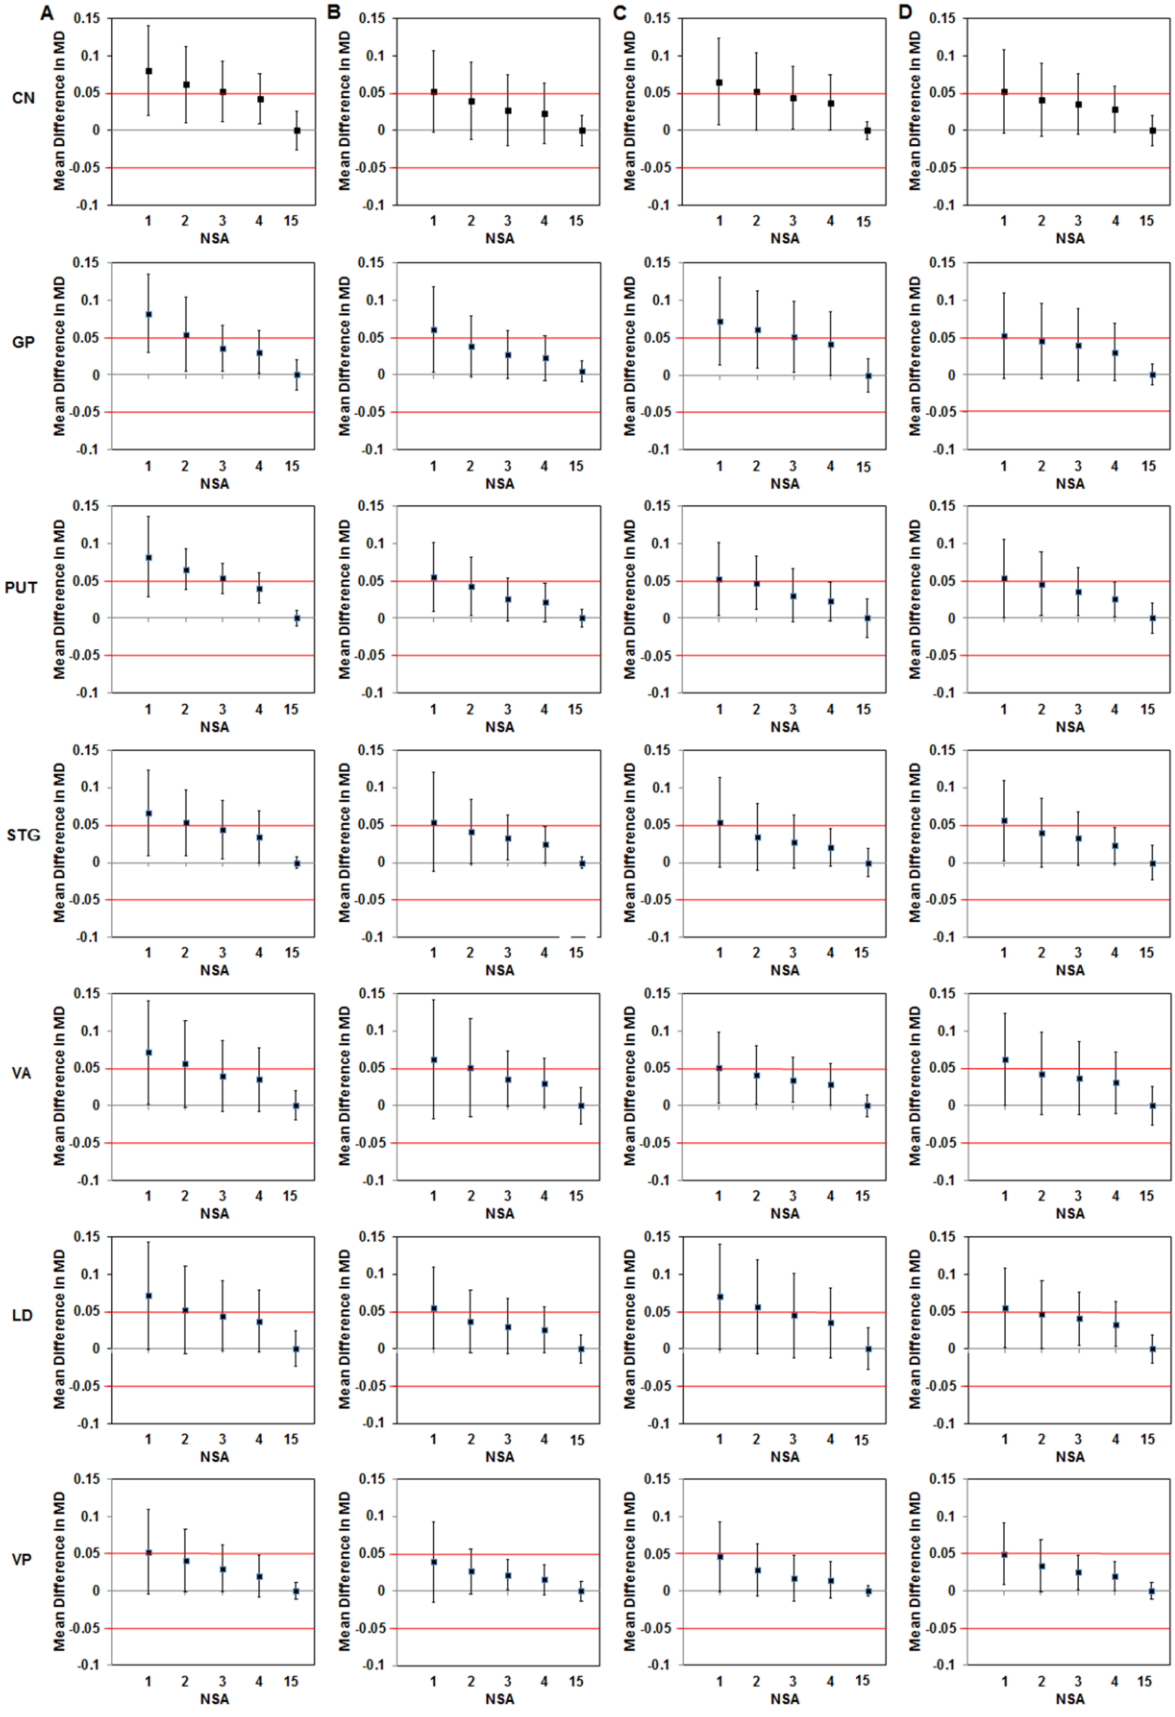

Supplementary Figure 2. Equivalence testing for the determination of the minimum NSA for bias-free MD evaluation is shown at voxel-based analysis at 1.5 T Philips (A), 3 T Philips (B), 3 T Siemens (C) and 3 T GE (D) MRI systems (Equivalence tolerance range = [-.05, .05]). MD, mean diffusivity; NSA, number of signal average. For voxel-based MD at 1.5 T Philips, CIs were not within the equivalence tolerance range of [-0.05, 0.05] for all the selected regions of the brain except VP, while for voxel-based MD at 3 T Philips, Siemens and GE, PUT and STG had equivalence threshold at NSA=4 and VP at NSA $\geq$ 3.

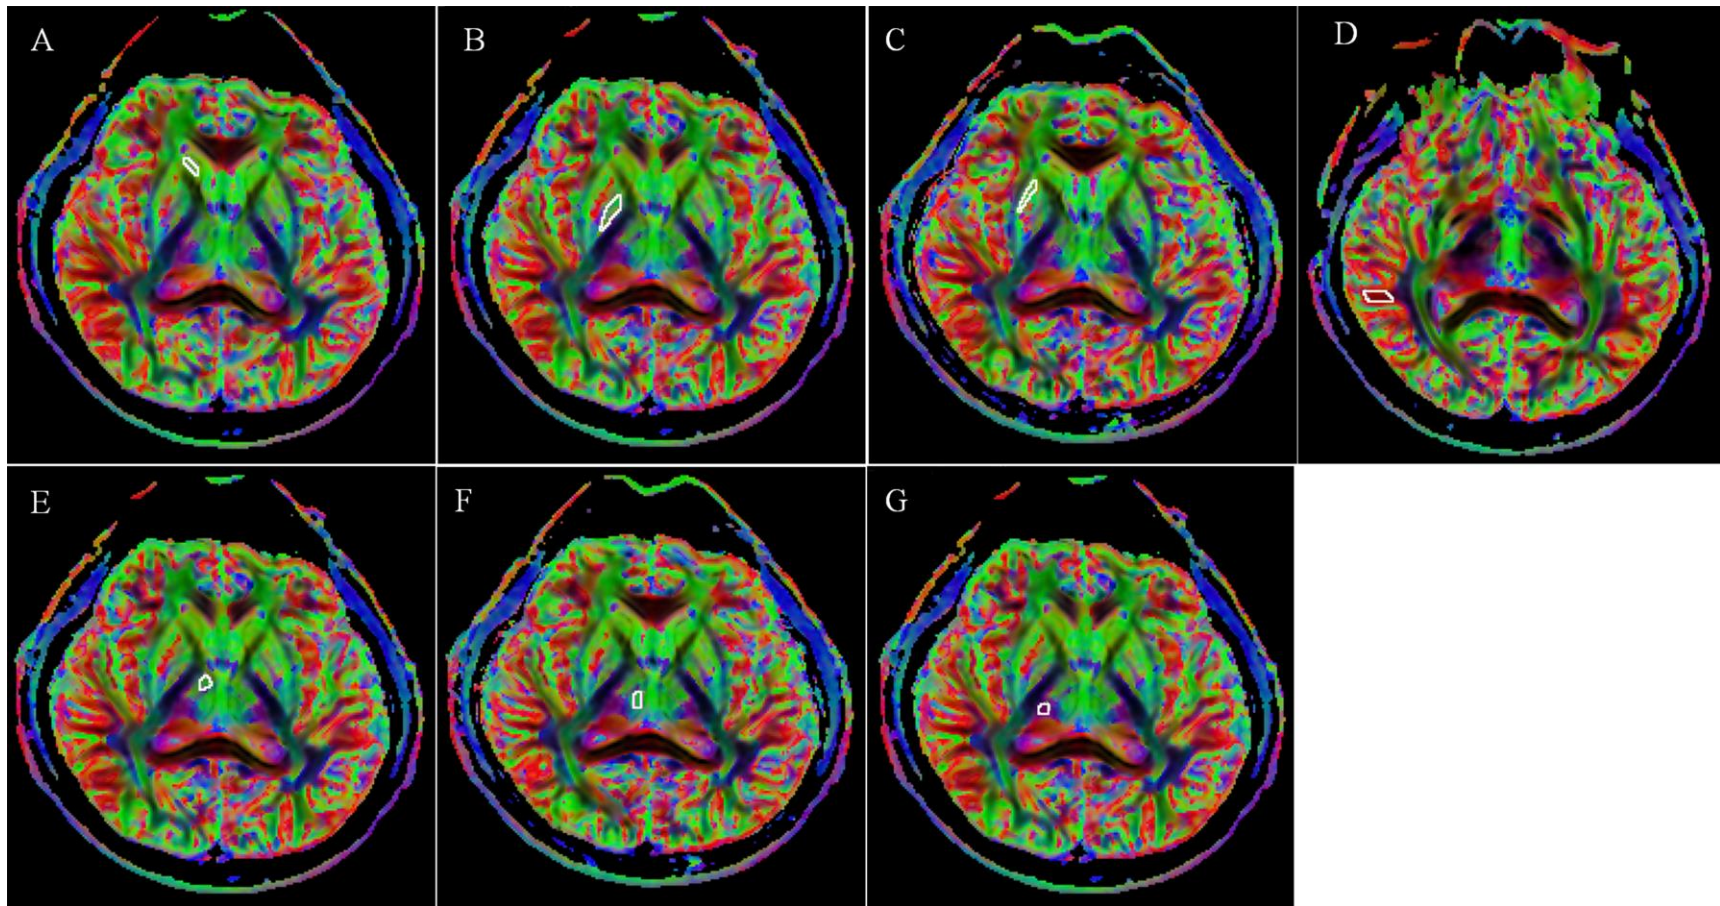

Supplementary Figure 3. ROIs (white) of CN (A), GP (B), PUT (C), STG (D), VA (E), LD (F) and VP (G) are placed for ROI-based and voxel-based analysis. The primary diffusion direction was color-coded but modulated by  $(1-FA)$  value to allow better visualization of low FA areas. CN, caudate nucleus; GP, globus pallidus; LD, lateral dorsal; NSA, number of signal average; PUT, putamen; ROI, region-of-interest; SNR, signal-to-noise ratio; STG, superior temporal gyrus; VA, ventral anterior; VP, ventral posterior.
